# Supplementary material
Source: PubMed Central journal article supplement (PMC412865)
Supplement: plntcell_tpc.015818_1.pdf [file plntcell_tpc.015818_1.pdf]

**Supplemental Table 1.** The *PMSR* gene family in *Arabidopsis*. Mapping of the gene family in the *Arabidopsis* genome ([www.arabidopsis.org](http://www.arabidopsis.org); July 2002). The number of ESTs has been used as a measure of expression of the genes.

| <b>Gene</b>  | <b>Chromosome</b> | <b>BACs</b>   | <b>Expression</b> |
|--------------|-------------------|---------------|-------------------|
| <i>PMSR1</i> | V                 | T2I1          | 9 ESTs            |
| <i>PMSR2</i> | V                 | K11J9         | 1 EST             |
| <i>PMSR3</i> | V                 | T2I1          | 2 ESTs            |
| <i>PMSR4</i> | IV                | F13M24, F24A6 | 12 ESTs           |
