# Supplementary material
Source: PubMed Central journal article supplement (PMC412865)
Supplement: plntcell_tpc.015818_2.pdf [file plntcell_tpc.015818_2.pdf]

A

```

PMSR1 1 -----NNILNR
PMSR2 1 -----NNILNR
PMSR4 1 MQLVIVVSPFLIAAASLSKPLNLSKAALSFSRAKFCPPQTSTRPISVYKSFHGGVFNK
PMSR3 1 -----NDSSSKTKQEPQVVTSPS

PMSR1 7 LGGSSGQTHNDPS...PIAQCHDDDPAPGNQFAQFGAGCFWGVELAQRVPGVTQTE
PMSR2 7 LGGSSRQTHNDPS...PIAQVIDDAPAPGNQFAQFGAGCFWGVELAQRVPGVTQTE
PMSR4 61 LGGSRFGQADPS...SAAIAQGPDDVPSSGQFAQFGAGCFWGVELAQRVPGVTQTE
PMSR3 19 FVAQEPQVADRPVIVPSPIAQCPDQVFPAGNDFASFAQCFWGVELAQRVPGVTQTE

PMSR1 63 AGTQCGIVDHPSYGDVCSGTTGSEVVRVQYDLDNCCYESLLDLFWSREDPTTLNRQGD
PMSR2 63 VGTSGGIRHPSYEDVCSGTTGSAEIVRVQYDPEKCCYESLLDLFWSREDPTTLNRQGD
PMSR4 119 VGTSGGIVHNPSELDVCSGTTGSEVVRVQYDPEKCCYESLLDLFWSREDPTTLNRQGD
PMSR3 79 VGTSGGIRHPSYEDVCSGTTGSAEIVRVQYDPEKCCYESLLDLFWSREDPTTLNRQGD

PMSR1 123 VGTQYRSGIYFYPPEQEKLAESLEKQCKLKKIVTEILPAKFFYRAESRHHQYLSKGG
PMSR2 123 VGTQYRSGIYFYPPEQEKLAESLEKQCKLKKIVTEILPAKFFYRAESRHHQYLSKGG
PMSR4 179 VGTQYRSGIYFYPPEQEKLAESLEKQCKLKKIVTEILPAKFFYRAESRHHQYLSKGG
PMSR3 139 VGTQYRSGIYFYPPEQEKLAESLEKQCKLKKIVTEILPAKFFYRAESRHHQYLSKGG

PMSR1 183 RFGGQSTNKGCDPIRCYG
PMSR2 183 RFGGQSTNKGCDPIRCYG
PMSR4 239 RFGGQSTNKGCDPIRCYG
PMSR3 199 RFGGQSTNKGCDPIRCYG

```

B

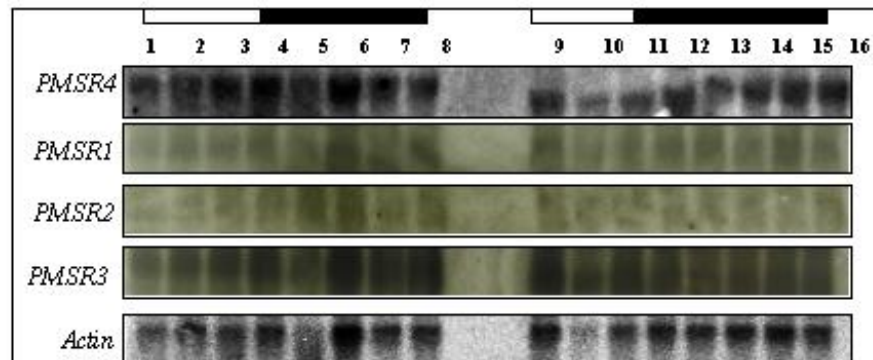

Figure 1S Bechtold et al

**Supplemental Figure 1. (A)** Sequence alignment of derived PMSR protein sequence.

**(B)** RNA blot analysis of PMSR transcripts during a 24 hour period. Lanes (1) WT 8:30, (2) WT 12:00, (3) WT 15:30, (4) WT 17:30, (5) WT 21:30, (6) WT 1:30, (7) WT 4:30, (8) WT 7:30, (9) *pmsr2-1* 8:30, (10) *pmsr2-1* 12:00, (11) *pmsr2-1* 15:30, (12) *pmsr2-1* 17:30, (13) *pmsr2-1* 21:30, (14) *pmsr2-1* 1:30, (15) *pmsr2-1* 4:30, (16) *pmsr2-1* 7:30. The white bars represent the light and the black bars the dark phase.
